# Supplementary material for: Development of user-friendly functional molecular markers for VvDXS gene conferring muscat flavor in grapevine
Source: PubMed Central journal article supplement (PMC3890582; doi:10.1007/s11032-013-9929-6), 2013-08-09
Supplement: 11032_2013_9929_MOESM3_ESM.pdf [file 11032_2013_9929_MOESM3_ESM.pdf]

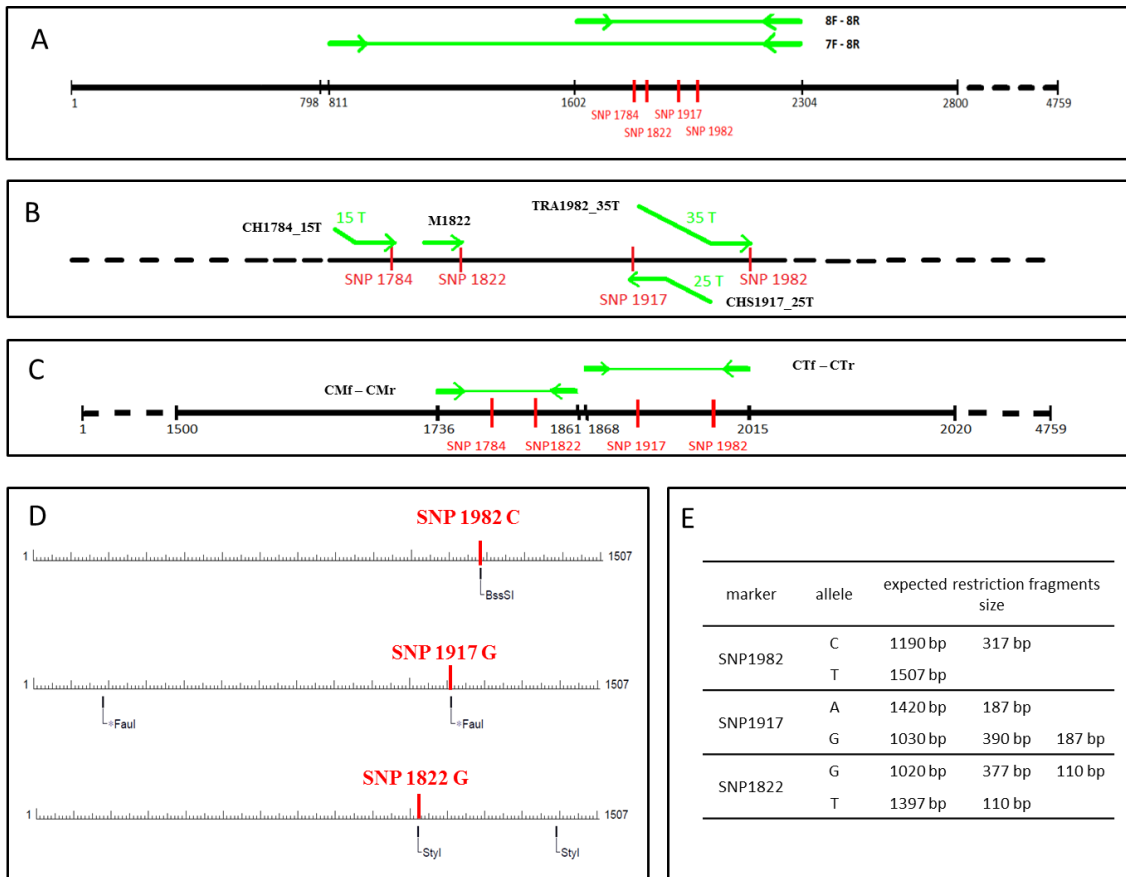

Online Resource Figure S3

Primer and amplicon localization in *VvDXS* gene (A to C), restriction sites positions (D) and the expected size of bands for the CAPS markers (E).
